# Supplementary material for: Leveraging transcription factors to speed cellobiose fermentation by Saccharomyces cerevisiae
Source: PubMed Central journal article supplement (PMC4243952; doi:10.1186/s13068-014-0126-6), 2014-08-27
Supplement: 13068_2014_126_MOESM4_ESM.pdf [file 13068_2014_126_MOESM4_ESM.pdf]

## Supporting Information

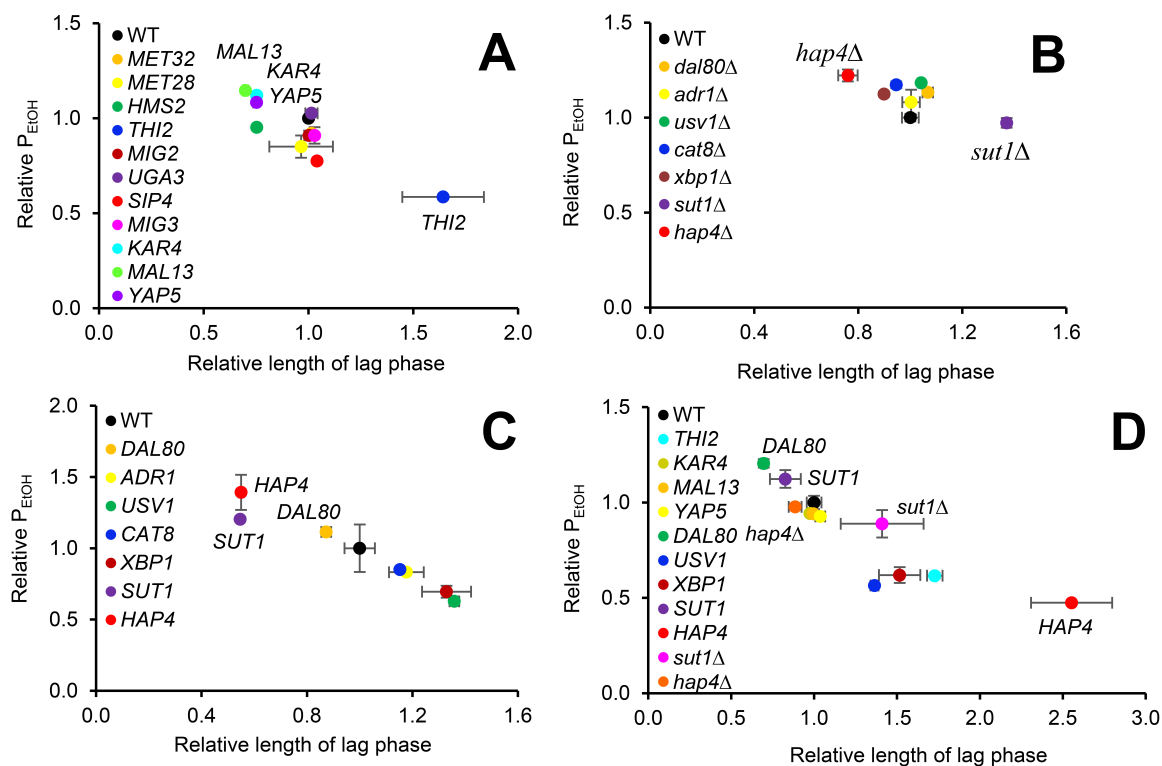

**Figure S1. The effects of manipulating TFs on cellobiose fermentation.**

Cellobiose fermentation by BY4742 with TF mutations and expressing the cellobiose utilization pathway from pRS316-BT. (A) Ethanol productivity using overexpression mutants of transcription factors with decreased expression levels on cellobiose, (B) deletion mutants or (C) overexpression mutants of transcription factors with increased expression levels on cellobiose. (D) Cellobiose fermentation using strain D452-2 with TF mutations and expressing the cellobiose utilization pathway from pRS316-BT. Relative ethanol productivities ( $P_{EtOH}$ ) and the relative length of the lag phase were obtained by comparisons to the wild-type strain (normalized to 1.0). Plots of relative  $P_{EtOH}$  versus relative length of the lag time are shown. Each point represents duplicate anaerobic fermentations using a starting cellobiose concentration of 80 g/L and starting  $OD_{600} = 1$ . The ethanol productivity and length of the lag phase for the WT BY4742 strain were  $0.41 (\pm 0.03)$  g/L/hr and  $88.39 (\pm 4.72)$  hr, respectively, and for the WT D452-2 strain were  $0.38 (\pm 0.01)$  g/L/hr and  $76.23 (\pm 2.83)$  hr.

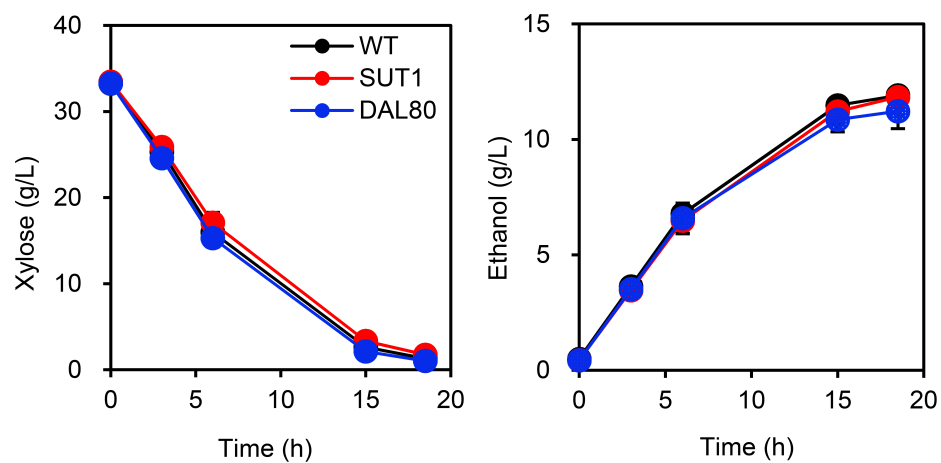

**Figure S2. Fermentation profiles using SR8 (*ura3*Δ) with overexpressed SUT1 (red line) and DAL80 (blue line) compared with the wild type (black line).**

**(A)** Xylose consumption; **(B)** Ethanol production.

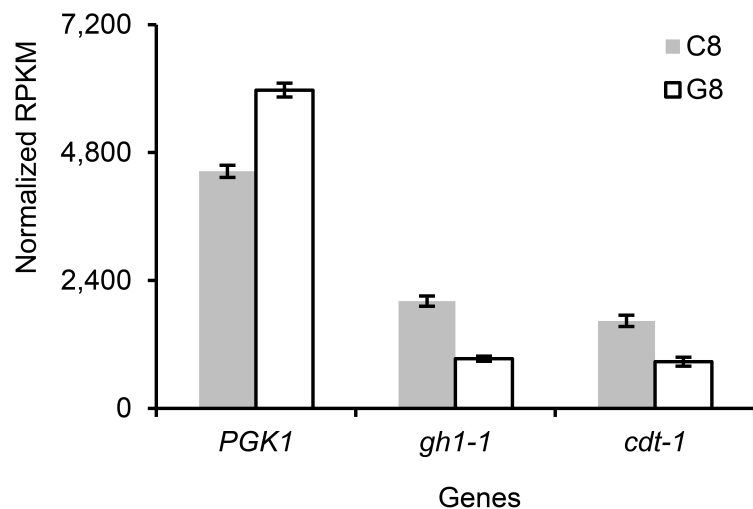

**Figure S3. Transcriptional expression levels of the heterologous cellobiose-utilizing pathway in cellobiose-grown cells (C8) and glucose-grown cells (G8).**

The p-values for difference in expression levels are:  $1 \times 10^{-17}$  for *PGK1*, 0 for *gh1-1*, and  $1 \times 10^{-7}$  for *cdt-1*.

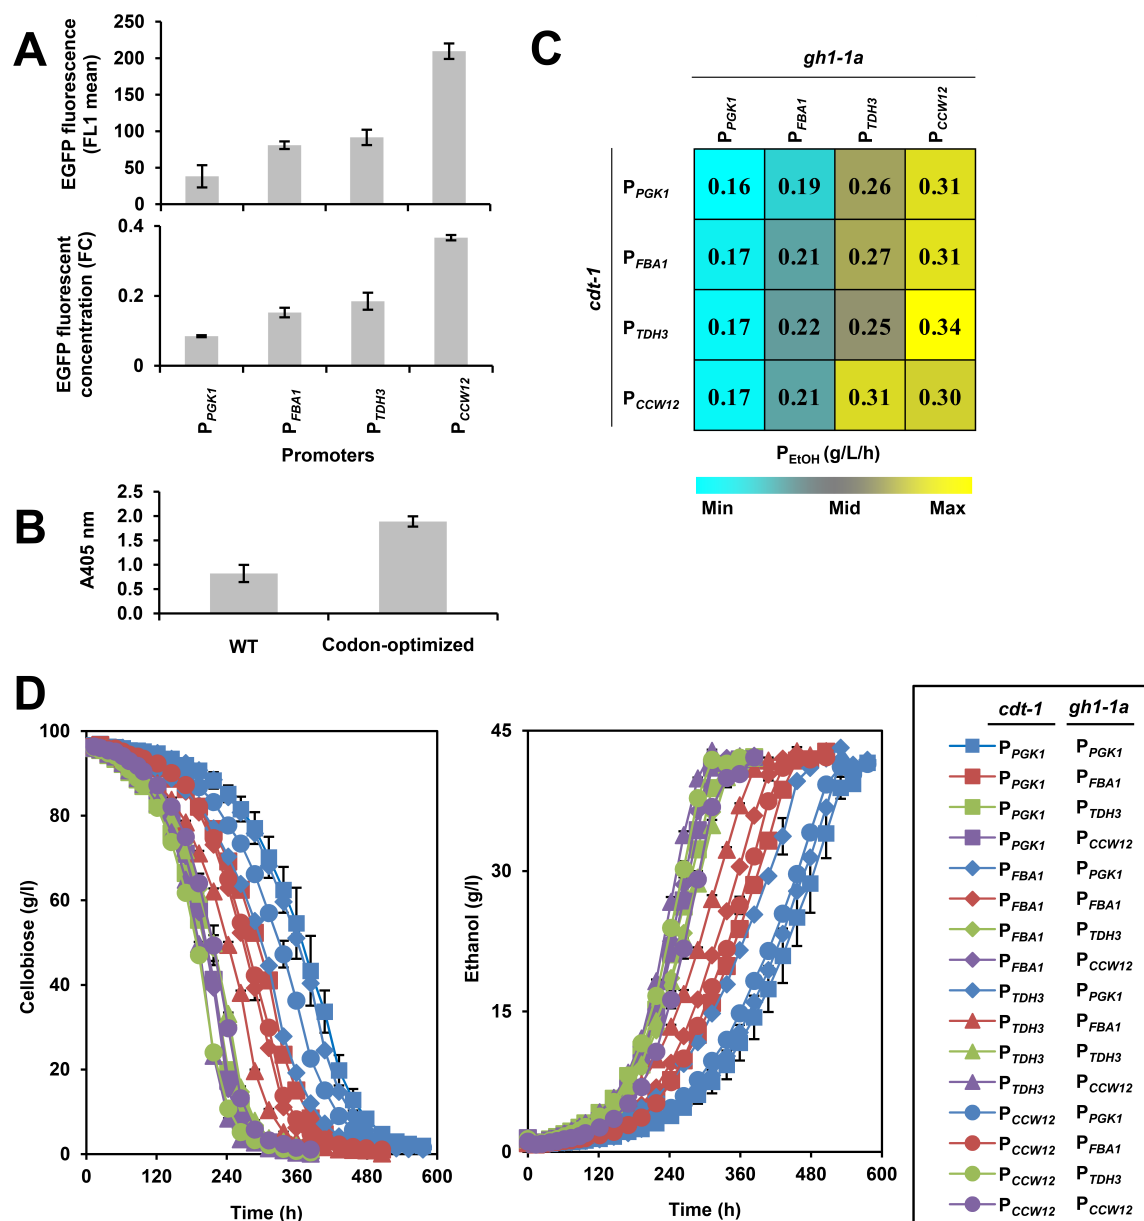

**Figure S4. Optimization of *cdt-1* and *gh1-1* expression for cellobiose fermentation in *S. cerevisiae* from a promoter library.**

(A) GFP fluorescence of *cdt-1* expressed from the different promoters in the promoter library; (B)  $\beta$ -glucosidase activities in 5  $\mu$ g of cell extract with wild-type and codon-optimized GH1-1 (encoded by *gh1-1a*); (C) Comparison of ethanol productivity of *cdt-1* and *gh1-1a* expressed from promoters in the promoter library. (D) Fermentation profiles of cellobiose consumption (left panel) and ethanol production (right panel) of strain D452-2 expressing the cellobiose utilization pathway using the promoter library. A starting culture OD<sub>600</sub> of 1 was used. Promoter combinations are shown to the right.

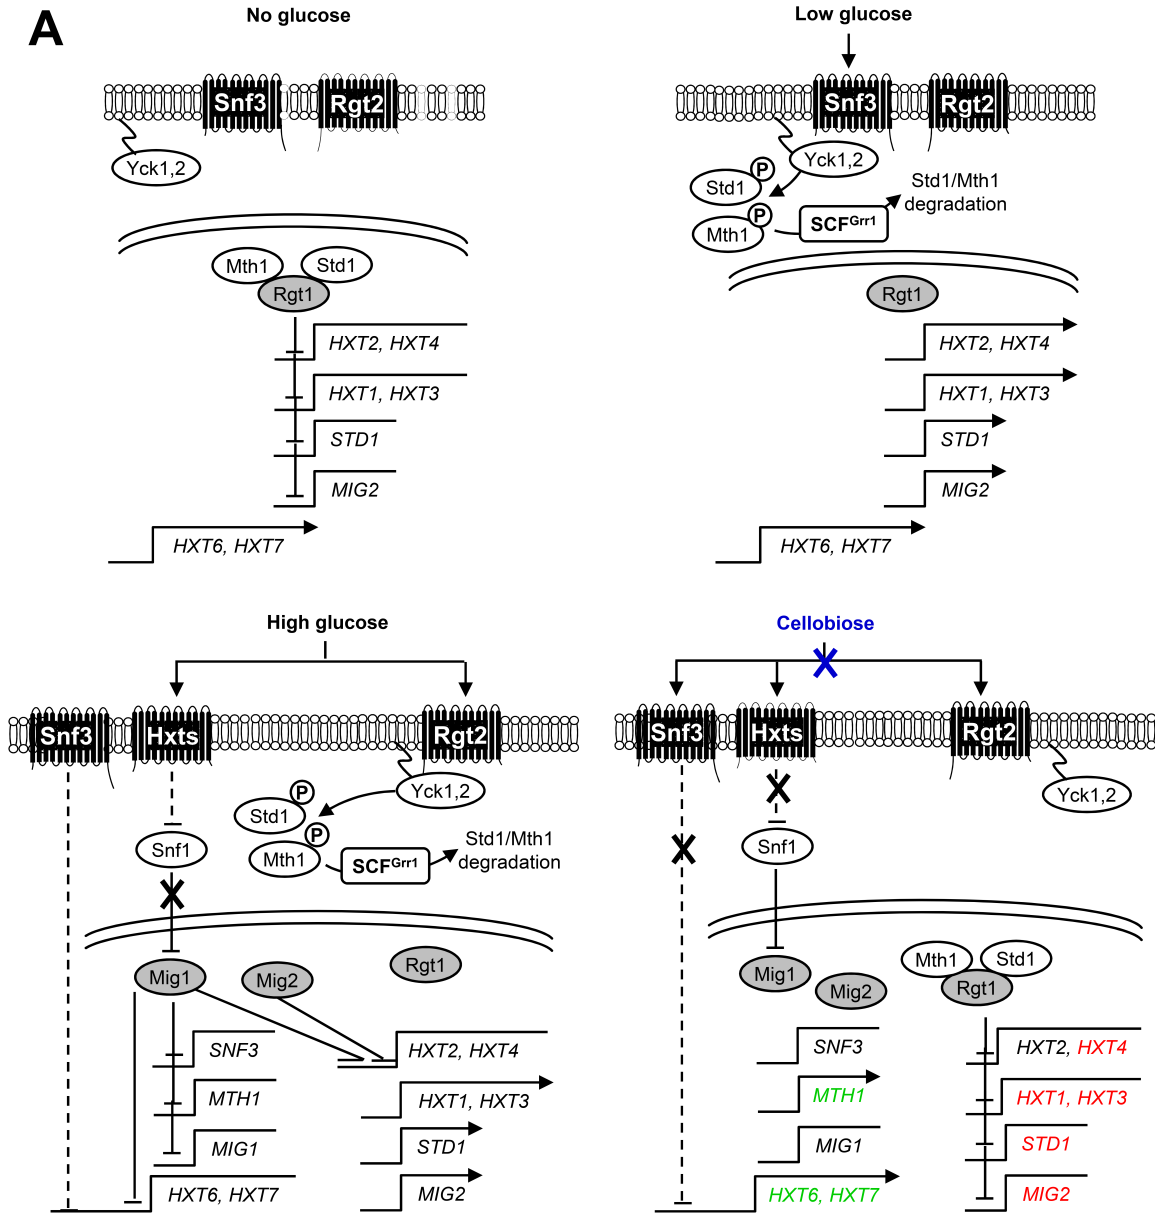

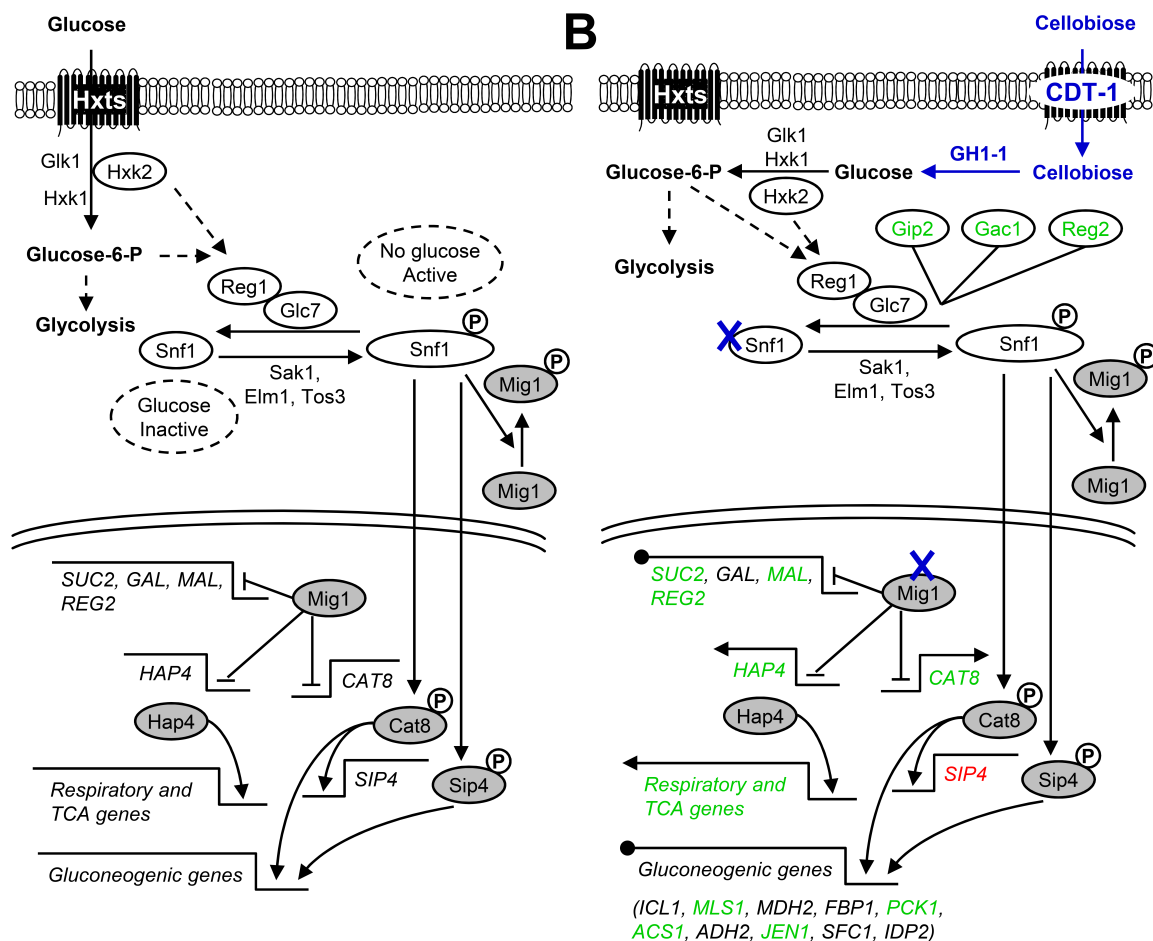

**Figure S5. Proposed model for regulation mechanisms of cellobiose utilization by engineered *S. cerevisiae*.**

(A) Misregulation of hexose transporters in cellobiose-grown cells. Regulation of *HXT* transporter gene expression in response to glucose (15, 16) and cellobiose are shown. (B) Partially inactive glucose repression pathway. The Snf1-Mig1 glucose repression pathway and gene expression of its targets are compared between in the presence of glucose (15) and cellobiose. In the presence of glucose, Snf1 is inactivated by mechanisms involving the Glc7-Reg1 complex that remain unclear (17, 18). The other regulatory subunits of Glc7-Gip2 (19) and Gac1 (19) that target Glc7 to various substrates for glycogen accumulation, and Reg2 (20) that targets Glc7 to substrates that are phosphorylated by Snf1 during glucose repression showed increased mRNA levels in cellobiose metabolism (Dataset S2). In both panels, down-regulated genes are highlighted in red, and up-regulated genes are highlighted in green.

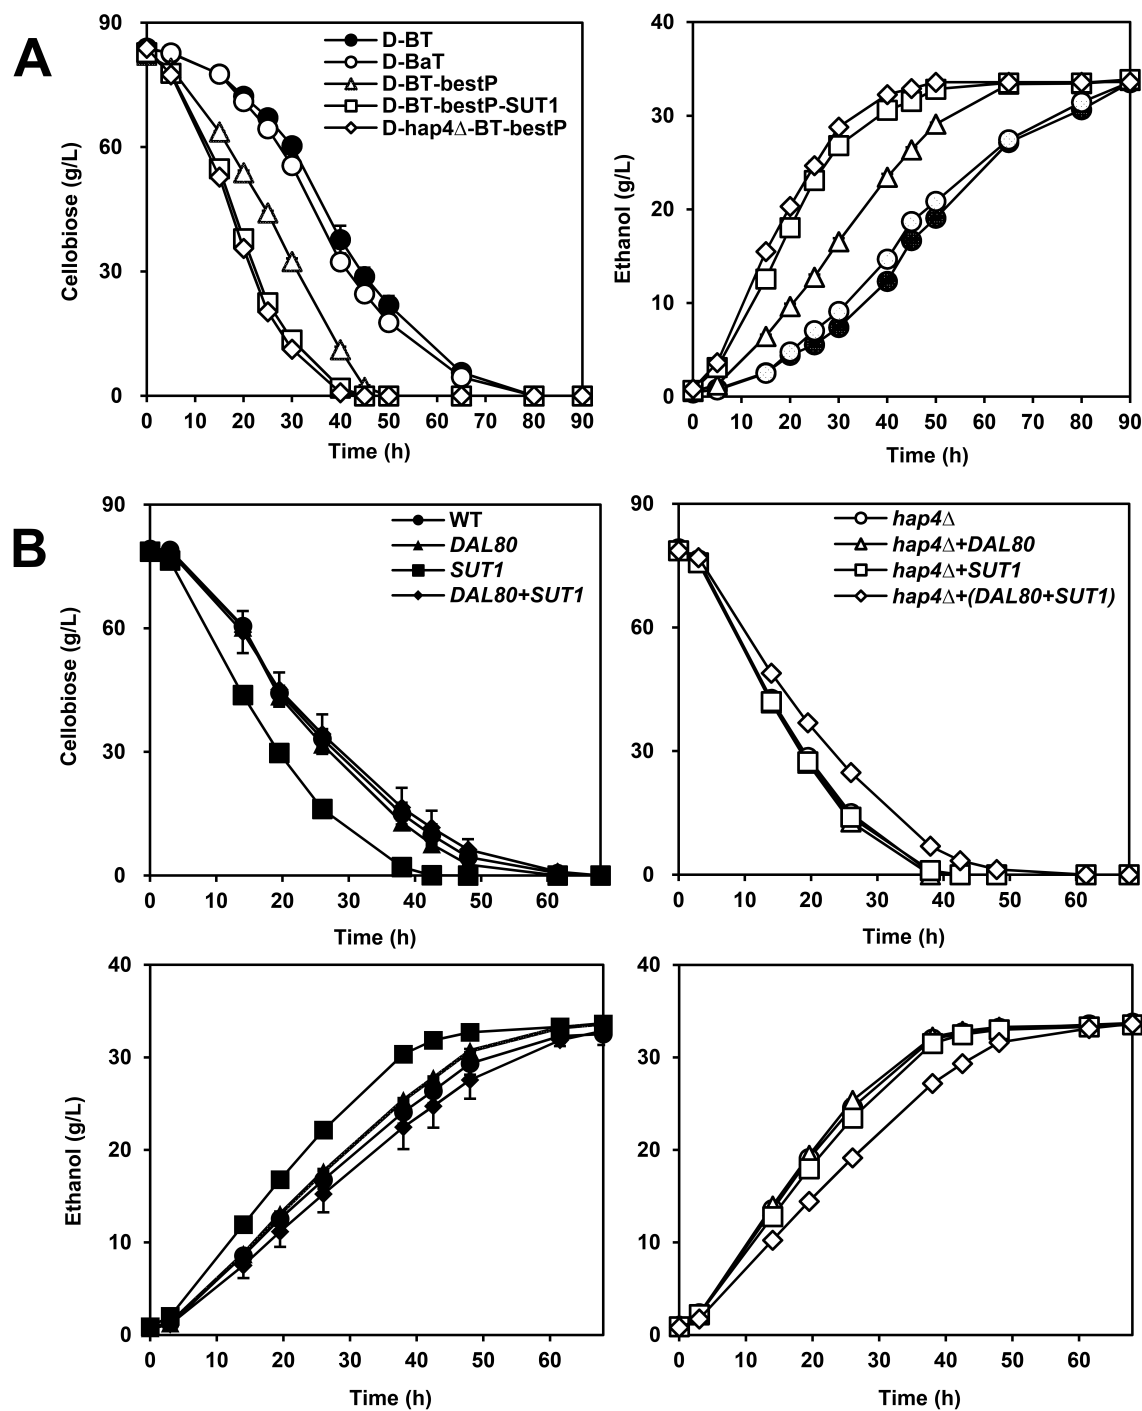

**Figure S6. Comparisons of cellobiose fermentation using strain D452-2 with the original and optimized cellobiose-utilizing pathways and TF mutants.**

**(A)** Cellobiose fermentation profiles with strains expressing the original and optimized cellobiose-utilization pathways, and additionally overexpressing *SUT1* or with a deletion of *hap4*. Strain information is listed in Table S1. **(B)** Cellobiose fermentation profiles using D452-2

with an optimized cellobiose-utilizing pathway ( $P_{TDH3}$ -driven *cdt-1* and  $P_{CCW12}$ -driven *ghl-1a*) with different TFs, starting with initial  $OD_{600} = 20$ .



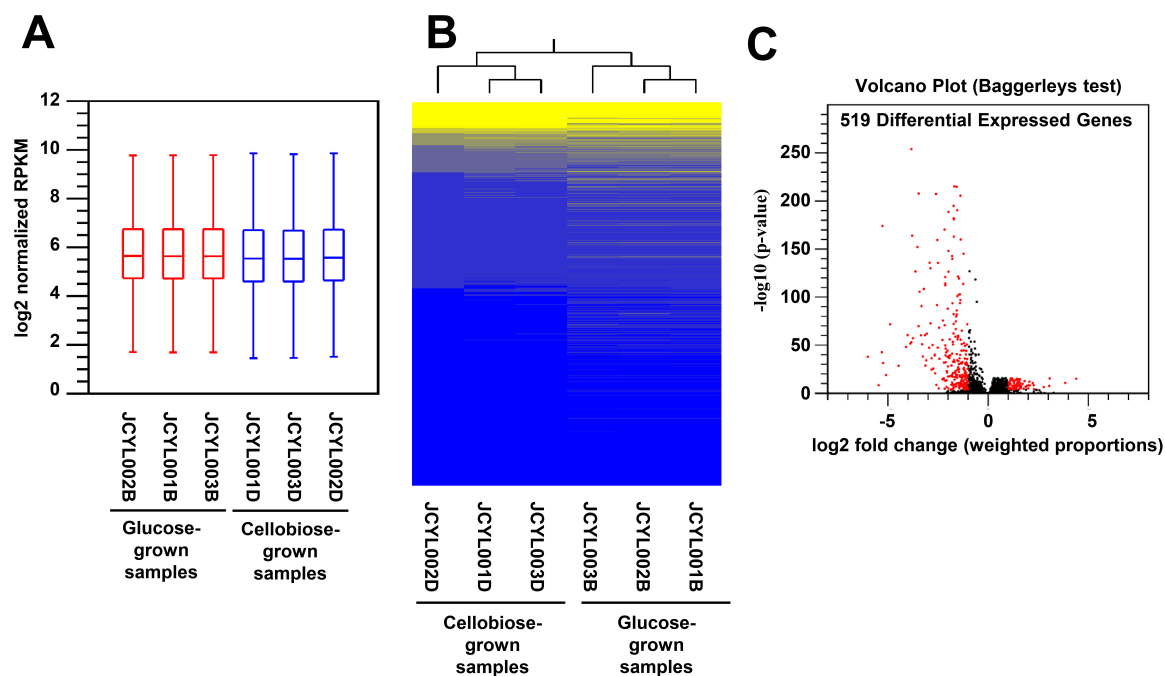

**Figure S7 RNA-seq and expression analysis using CLC Genomics workbench.**

(A) Box plot of 6 samples in color-coded 2 groups; (B) Hierarchical clustering of 6 samples with 2 clusters; (C) Statistical analysis to identify significantly differential expressed genes colored in read in volcano plots. The criteria were (FDR)-corrected cut off p value  $\leq 0.001$  and absolute fold changes threshold  $\geq 2.0$ , correspondingly  $-\log(\text{p value}) \geq 3$  and absolute  $\log_2$  fold changes  $\geq 1.0$ .

ATGTCTTTGCCAAAAGATTTTCTATGGGGTTTCGCTACCGCAGCCTATCAAATTGAGGGCGCTATTCACG  
 CTGATGGCAGAGGACCATCAATTTGGGATACATTTTGAATATCCCAGGTAAGATAGCTGACGGATCTTC  
 CGGAGCTGTGGCATGTGACTCATAACAAGAAAAGAGGATATCGACTTATTGAAATCACTTGGGGCA  
 ACTGCTTACAGATTCTCTATTAGTTGGTCTAGAATCATTCCAGTAGGGGGCAGAAATGACCCTATCAATC  
 AGAAGGGTATTGATCATTACGTTAAGTTTGTGGATGATCTTTTGGAAAGCTGGGATAACTCCATTCATCAC  
 ATTGTTCCATTGGGATTTGCCAGATGGTTTGGACAAAAGATACGGAGGCTTACTAAACAGGGAAGAGTTT  
 CCACTAGATTTTGAACACTACGCTAGAACCATGTTCAAAGCTATCCCTAAGTGTAACATTGGATTACCT  
 TTAACGAACCTTGGTGTTCCTCAATACTTGGTTACAATTCTGGTTACTTTGCACCAGGGCATAACATCTGA  
 CCGTACTAAGAGTCCAGTTGGCGATTAGCTAGAGAACCATGGATTGTAGGCCATAACTTACTTATCGCA  
 CACGGAAGAGCTGTTAAAGTGTATAGAGAAGATTTCAAGCCTACTCAAGGTGGCGAGATCGGAATAACTC  
 TGAATGGTGACGCCACACTGCCATGGGACCCAGAAGATCCATTAGACGTTGAAGCCTGTGATCGTAAGAT  
 AGAATTTGCCATATCATGGTTTGCAGATCCTATCTACTTCGAAAAGTACCCAGATTCTATGAGAAAACAG  
 TTAGGTGACAGACTACCAGAGTTTACTCCTGAGGAGGTTGCTTTGGTGAAAGGTAGTAATGACTTCTATG  
 GTATGAACCATTACACAGCAAACACTACATCAAACACAAAAGGGGGTTCCACCAGAAGATGACTTCCCTGGG  
 TAATCTGGAAACCTTATTCTATAACAAAAGGGAAACTGCATCGGTCCTGAAACACAATCCTTCTGGTTA  
 AGACCACACGCCCAAGGTTTTAGAGATCTTTTGAATTGGTTGTCTAAGCGTTACGGATACCCTAAGATCT  
 ACGTTACAGAAAACGGTACATCTTTGAAAGGCGAAAATGCAATGCCTTTGAAACAAATTGTTGAGGATGA  
 CTTTtagggTAAAGTACTTCAATGATTACGTCAATGCCATGGCTAAAGCTCATTCCGAAGATGGCGTGAAT  
 GTCAAAGGGTACTTAGCATGGAGTTTGTGATGGATAACTTTGAGTGGGCCGAAGGATATGAAACAAGATTTG  
 GCGTCACTTACGTAGATTATGAAAATGACCAAAAAGAGATACCCAAAAGAAATCAGCCAAATCCCTTAAACC  
 TCTATTCGATTCACTAATCAAAAAGGAC**CATCATCATCATCAT**TAA

**Figure S8.** The DNA sequence of codon-optimized *ghl-1* (*ghl-1a*) with a C-terminal His<sub>6</sub> tag. The sequence encoding the His<sub>6</sub> tag is in bold.

**Table S1. Plasmids and *S. cerevisiae* strains used in this study**

| Plasmid or strain                 | Description                                                                                                                                                                                                                                                                                                                              | Reference or source |
|-----------------------------------|------------------------------------------------------------------------------------------------------------------------------------------------------------------------------------------------------------------------------------------------------------------------------------------------------------------------------------------|---------------------|
| Plasmids                          |                                                                                                                                                                                                                                                                                                                                          |                     |
| pRS426                            | <i>URA3</i> , 2- $\mu$ m origin                                                                                                                                                                                                                                                                                                          | (3)                 |
| pRS426-BT                         | <i>N. crassa gh1-1</i> and <i>cdt-1</i> under the control of <i>PGK1</i> promoter and <i>CYC1</i> terminator in pRS426                                                                                                                                                                                                                   | This study          |
| pRS316                            | <i>URA3</i> , ARS/CEN origin                                                                                                                                                                                                                                                                                                             | (4)                 |
| pRS316-BT                         | <i>N. crassa gh1-1</i> and <i>cdt-1</i> under the control of <i>PGK1</i> promoter and <i>CYC1</i> terminator in pRS316                                                                                                                                                                                                                   | This study          |
| pRS316-BaT                        | Codon-optimized <i>gh1-1a</i> and <i>cdt-1</i> under the control of <i>PGK1</i> promoter and <i>CYC1</i> terminator in pRS316                                                                                                                                                                                                            | This study          |
| pRS316-BT-best                    | The best-tuned cellobiose-utilizing pathway in pRS316 composed of $P_{TDH3}$ -driven <i>gh1-1a</i> and $P_{CCW12}$ -driven <i>cdt-1</i>                                                                                                                                                                                                  | This study          |
| pRS313                            | <i>HIS3</i> , ARS/CEN origin                                                                                                                                                                                                                                                                                                             | (4)                 |
| pRS313-TEF1-CYC1                  | <i>HIS3</i> , CEN plasmid, <i>TEF1</i> promoter and <i>CYC1</i> terminator, used for making the constructs to overexpress TFs                                                                                                                                                                                                            | This study          |
| pRS315                            | <i>LEU2</i> , ARS/CEN origin, used for overexpressing codon-optimized <i>gh1-1a</i>                                                                                                                                                                                                                                                      | (4)                 |
| <i>S. cerevisiae</i> strains      |                                                                                                                                                                                                                                                                                                                                          |                     |
| BY4742                            | MATalpha his3 $\Delta$ 1 leu2 $\Delta$ 0 lys2 $\Delta$ 0 ura3 $\Delta$ 0                                                                                                                                                                                                                                                                 | Open Biosystems     |
| D452-2                            | MATalpha, <i>leu2</i> , <i>his3</i> , <i>ura3</i> , and <i>can1</i>                                                                                                                                                                                                                                                                      | (5)                 |
| D452-2 ( <i>hap4</i> $\Delta$ )   | MATalpha, <i>leu2</i> , <i>his3</i> , <i>ura3</i> , and <i>can1</i> , <i>hap4::KanMX</i>                                                                                                                                                                                                                                                 | This study          |
| D452-2 ( <i>sut1</i> $\Delta$ )   | MATalpha, <i>leu2</i> , <i>his3</i> , <i>ura3</i> , and <i>can1</i> , <i>sut1::KanMX</i>                                                                                                                                                                                                                                                 | This study          |
| SR8                               | ald6 $\Delta$ of the evolved strain D452-2 <i>leu2::LEU2</i> $P_{TDH3}$ - <i>XYL1</i> - $T_{TDH3}$ ; <i>ura3::URA3</i> $P_{TDH3}$ - <i>XYL1</i> - $T_{TDH3}$ $P_{PGK1}$ - <i>XYL2</i> - $T_{PGK1}$ $P_{TDH3}$ - <i>XYL3</i> - $T_{TDH3}$ ; <i>his1::HIS1</i> $P_{PGK1}$ - <i>XYL2</i> - $T_{PGK1}$ $P_{TDH3}$ - <i>XYL3</i> - $T_{TDH3}$ | (6)                 |
| SR8 ( <i>ura3</i> $\Delta$ )      | Evolved xylose-utilizing strain derived from D452-2, auxotrophic for uracil                                                                                                                                                                                                                                                              | (6)                 |
| D-BT                              | D452-2 expressing <i>gh1-1</i> and <i>cdt-1</i> under the control of <i>PGK1</i> promoter in pRS316-BT and empty vector pRS313-TEF1-CYC1                                                                                                                                                                                                 | This study          |
| D-BaT                             | D452-2 expressing codon-optimized <i>gh1-1a</i> and <i>cdt-1</i> under the control of <i>PGK1</i> promoter in pRS316-BaT and empty vector pRS313-TEF1-CYC1                                                                                                                                                                               | This study          |
| D-BT-bestP                        | D452-2 expressing the best-tuned cellobiose-utilizing pathway in pRS316-BT-best composed of $P_{TDH3}$ -driven <i>gh1-1a</i> and $P_{CCW12}$ -driven <i>cdt-1</i> and empty vector pRS313-TEF1-CYC1                                                                                                                                      | This study          |
| D-BT-bestP-SUT1                   | D452-2 expressing the best-tuned cellobiose-utilizing pathway in pRS316-BT-best and overexpressed <i>SUT1</i> in pRS313                                                                                                                                                                                                                  | This study          |
| D- <i>hap4</i> $\Delta$ -BT-bestP | D452-2 <i>hap4</i> deletion strain expressing the best-tuned cellobiose-utilizing pathway in pRS316-BT-best                                                                                                                                                                                                                              | This study          |

**Table S2. Primers used in this study**

| Name                                   | Sequence (5' → 3')                                                                                                                                      | Application                                                    |
|----------------------------------------|---------------------------------------------------------------------------------------------------------------------------------------------------------|----------------------------------------------------------------|
| Primers for cloning into pRS313 vector |                                                                                                                                                         |                                                                |
| pRS313-F-2                             | ACTAGTTCTAGAAAACCTTAGATTAGATTGCTATGCTTTCTTTCTAATG                                                                                                       | PCR amplification of linear pRS313-TEF1-CYC1 from SpeI to XhoI |
| pRS313-R-2                             | CTCGAGTCATGTAATTAGTTATGTCACGCTTACATTAC                                                                                                                  |                                                                |
| MET32-313 SpeI F                       | TTTTCTAGAACTAGTATGGAGGATCAGGATGCTGC                                                                                                                     | MET32 overexpression                                           |
| MET32-313 XhoI R                       | ATTACATGACTCGAGTCAGCCATTACTGCTACCATTG                                                                                                                   | MET32 overexpression                                           |
| MET28-313 SpeI F                       | TTTTCTAGAACTAGTATGAGTGCAGAAACAAGGGTGG                                                                                                                   | MET28 overexpression                                           |
| MET28-313 XhoI R                       | ATTACATGACTCGAGCTACCTGCCATGTTCCGTCTC                                                                                                                    | MET28 overexpression                                           |
| THI2-313 SpeI F                        | TTTTCTAGAACTAGTATGGTCAATAGTAAGAGGCAGCAGAG                                                                                                               | THI2 overexpression                                            |
| THI2-313 XhoI R                        | ATTACATGACTCGAGTCAGCTAGTCATGGCATATACATCC                                                                                                                | THI2 overexpression                                            |
| MIG2-313 SpeI F                        | TTTTCTAGAACTAGTATGCCTAAAAAGCAAACGAATTTCC                                                                                                                | MIG2 overexpression                                            |
| MIG2-313 XhoI R                        | ATTACATGACTCGAGTTAAACTCTTTTGGGACCGTTGAAAAC                                                                                                              | MIG2 overexpression                                            |
| UGA3-313 SpeI F                        | TTTTCTAGAACTAGTATGAATTATGGCGTGGAGAAGC                                                                                                                   | UGA3 overexpression                                            |
| UGA3-313 XhoI R                        | ATTACATGACTCGAGTCAGGCAAAATTAATATTGTAATCTAAT                                                                                                             | UGA3 overexpression                                            |
| SIP4-313 SpeI F                        | TTTTCTAGAACTAGTATGGCCAAGAGGAAATATGGCAG                                                                                                                  | SIP4 overexpression                                            |
| SIP4-313 XhoI R                        | ATTACATGACTCGAGTTAGAAGGTCGAGTTCAAAATATTCTGG                                                                                                             | SIP4 overexpression                                            |
| MIG3-313 SpeI F                        | TTTTCTAGAACTAGTATGAATTACCTGCGAGATAGATTTCC                                                                                                               | MIG3 overexpression                                            |
| MIG3-313 XhoI R                        | ATTACATGACTCGAGTTATTTACTGAAGTAAGAAGGAGCACTG                                                                                                             | MIG3 overexpression                                            |
| HMS2-313 SpeI F                        | TTTTCTAGAACTAGTATGGATGCAACATCGAGGATGG                                                                                                                   | HMS2 overexpression                                            |
| HSM2-313 XhoI R                        | ATTACATGACTCGAGTCACGTTCCGAAGATGTTTGGAAAG                                                                                                                | HMS2 overexpression                                            |
| KAR4-313 SpeI F                        | TTTTCTAGAACTAGTATGGCATTCCAAGATCCAACCTTACG                                                                                                               | KAR4 overexpression                                            |
| KAR4-313 XhoI R                        | ATTACATGACTCGAGTTATTTGTGCTTTTTGTACTGGACTTCTTG                                                                                                           | KAR4 overexpression                                            |
| MAL13-313 SpeI F                       | TTTTCTAGAACTAGTATGACTTTAACTAAGCAAAACATGCGC                                                                                                              | MAL13 overexpression                                           |
| MAL13-313 XhoI R                       | ATTACATGACTCGAGTCAAGGGTCTATGTCTTCATTATCCTTG                                                                                                             | MAL13 overexpression                                           |
| YAP5-313 SpeI F                        | TTTTCTAGAACTAGTATGGCTCTACCTCTGATAAAACCTAAGG                                                                                                             | YAP5 overexpression                                            |
| YAP5-313 XhoI R                        | ATTACATGACTCGAGTCAGTGGATGATGGACCGGAT                                                                                                                    | YAP5 overexpression                                            |
| DAL80-313 SpeI F                       | TTTTCTAGAACTAGTATGGTGCTTAGTGATTCGTTGAAGC                                                                                                                | DAL80 overexpression                                           |
| DAL80-313 XhoI R                       | ATTACATGACTCGAGTTAATGTTGTGGGTGAGATTGTACTGAAG                                                                                                            | DAL80 overexpression                                           |
| ADR1-313 SpeI F                        | TTTTCTAGAACTAGTATGGCTAACGTAAGAAAACCAAACG                                                                                                                | ADR1 overexpression                                            |
| ADR1-313 XhoI R                        | ATTACATGACTCGAGTCAACTGTTTCCCTTTAGATGATTTTCC                                                                                                             | ADR1 overexpression                                            |
| USV1-313 SpeI F                        | TTTTCTAGAACTAGTATGGAAAAATACCACGAATCGTAATACTG                                                                                                            | USV1 overexpression                                            |
| USV1-313 XhoI R                        | ATTACATGACTCGAGTCAAGTCAATATGTAATCAACACTAAGCC                                                                                                            | USV1 overexpression                                            |
| CAT8-313 SpeI F                        | TTTTCTAGAACTAGTATGGCAAATAATAATTCTGATCGACAAG                                                                                                             | CAT8 overexpression                                            |
| CAT8-313 XhoI R                        | ATTACATGACTCGAGTTATTTGGCGTTTTGGCATTGG                                                                                                                   | CAT8 overexpression                                            |
| XBP1-313 SpeI F                        | TTTTCTAGAACTAGTATGAAATATCCCGCTTTTAGCATTAAACAG                                                                                                           | XBP1 overexpression                                            |
| XBP1-313 XhoI R                        | ATTACATGACTCGAGTTATTTGTTTGGTTTGTAAAATTGAAATTG                                                                                                           | XBP1 overexpression                                            |
| SUT1-313 SpeI F                        | TTTTCTAGAACTAGTATGTCACAAGCATTACAGTAAGAAATAGAG                                                                                                           | SUT1 overexpression                                            |
| SUT1-313 XhoI R                        | ATTACATGACTCGAGCTAAAAATCAATGCTTTTATAGTCATCATAGG                                                                                                         | SUT1 overexpression                                            |
| Hap4-RF-423 SpeI F                     | GCAATCTAATCTAAGTTTTCTAGAACTAGTATGACCGCAAAGACTTTTCTACTA<br>C                                                                                             | HAP4 overexpression                                            |
| Hap4-RF-423 XhoI R                     | AGCGTGACATAACTAATTACATGACTCGAGTCAAATACTTGTACCTTTAAAA<br>AATCG                                                                                           | HAP4 overexpression                                            |
| Primers for deletion HAP4 or SUT1      |                                                                                                                                                         |                                                                |
| HAP4-D-F                               | ATTGTTTTACCTACATTTTCTAGTACAAAAAACAACAAAAAAGAACTAGGTCTAGAGATCTGTTTAGC<br>TTGC                                                                            |                                                                |
| HAP4-D-R                               | TTTGTTCCTGATTTTTAGTTGTTTCGTTTTATTGCAACATGCCTATTATTAAGGGTTCTCGAGAGCTCG<br>AAGTGCAACACATAATCTAAATCATTGAGGTATCGTATGTCAAAGAAGTAGGTCTAGAGATCTGTTTAG<br>CTTGC |                                                                |
| SUT1-D-F                               |                                                                                                                                                         |                                                                |
| SUT1-D-R                               | TTAATGCTAAATGCAAGTTTTGTGATGCTATTCATTAGAGATGCCTTTGTATTAAGGGTTCTCGAGAGCTCG<br>CTGCAGCGAGGAGCCGTAAT                                                        |                                                                |
| KanB                                   |                                                                                                                                                         |                                                                |
| HAP4-Vf                                | CCTTACCTCTCTAAACCCAG                                                                                                                                    |                                                                |
| SUT1-Vf                                | CATACATGACAGATCCACATTTGC                                                                                                                                |                                                                |
| HAP4-Vf-R                              | CGGATATGTGAAAATGCTCTTAGG                                                                                                                                |                                                                |
| SUT1-Vf-R                              | AGGACTGTTCAAGCAATTCAATG                                                                                                                                 |                                                                |
